# Supplementary material for: Liability Factors and Conceptual Framework for Contracts to Manage Design for Digital Fabrication in Construction Projects
Source: Atypon-hosted journal article supplement (doi:10.1061/(asce)la.1943-4170.0000578), 2022-10-31
Supplement: supplemental_materials_la.1943-4170.0000578_ng.pdf [file supplemental_materials_la.1943-4170.0000578_ng.pdf]

## SUPPLEMENTAL MATERIALS

*ASCE Journal of Legal Affairs and Dispute Resolution in Engineering  
Construction*

# Liability Factors and Conceptual Framework for Contracts to Manage Design for Digital Fabrication in Construction Projects

Ming Shan Ng, Daniel Mark Hall, and Shang-Hsien Hsieh

**DOI:** 10.1061/(ASCE)LA.1943-4170.0000578

© ASCE 2022

[www.ascelibrary.org](http://www.ascelibrary.org)

**TABLE S1.** Qualifications of the 14 experts for the Delphi survey. Abbreviation: DFAB = digital fabrication

|    | <b>Role for Project Q</b>  | <b>Current position</b> | <b>Profession</b>                 | <b>Experience of work</b> |               |
|----|----------------------------|-------------------------|-----------------------------------|---------------------------|---------------|
|    |                            |                         |                                   | <b>Contracts</b>          | <b>Abroad</b> |
| 1  | Project owner              | Project Manager         | Project Manager                   | ✓                         |               |
| 2  | Project owner              | Engineer                | Civil Engineer                    |                           |               |
| 3  | Design Architect           | Director                | Architect                         | ✓                         | ✓             |
| 4  | Design Architect           | Director                | Architect                         | ✓                         | ✓             |
| 5  | Executive Architect        | Vice President          | Architect                         | ✓                         |               |
| 6  | Executive Architect        | Vice President          | Architect                         | ✓                         | ✓             |
| 7  | General Contractor         | Vice President          | Civil Engineer & Contract Manager | ✓                         | ✓             |
| 8  | General Contractor         | Project Manager         | Architect & Project Manager       | ✓                         |               |
| 9  | DFAB Trade Contractor      | Vice President          | Civil Engineer                    | ✓                         |               |
| 10 | BIM Consultant             | President               | BIM Manager                       | ✓                         | ✓             |
| 11 | BIM Consultant             | Project Manager         | BIM Manager                       |                           |               |
| 12 | Facade Consultant          | Consultant              | Facade Engineer                   |                           | ✓             |
| 13 | Geometry Design Consultant | Architect Lead          | Architect                         |                           | ✓             |
| 14 | Geometry Design Consultant | Director                | Architect                         | ✓                         | ✓             |

**TABLE S2.** 163 liability factors identified in this work. Abbreviation: DFAB = digital fabrication; n = total number of valid observations = 163;  $\mu$  = mean;  $\sigma$  = standard deviation.

|                                            | Round 1, Round 2 and Round 3 |          |      | Ranked by                                                       |                                                      |                              | Definition                                                                                                                   |
|--------------------------------------------|------------------------------|----------|------|-----------------------------------------------------------------|------------------------------------------------------|------------------------------|------------------------------------------------------------------------------------------------------------------------------|
|                                            | $\mu$<br>Med.                | Min.     | Max. | n                                                               | RI                                                   | $\sigma$                     |                                                                                                                              |
| <b>ACTORS (n=13)</b>                       |                              |          |      |                                                                 |                                                      |                              |                                                                                                                              |
| General contractor                         | 4.56                         | 3        | 5    | 14                                                              | 4                                                    | 62                           | Team(s) who is responsible for the overall coordination in delivery of a project                                             |
| DFAB Trade contractor                      | 3.79                         | 4        | 0.89 | 5                                                               | 54                                                   | 54                           | Team(s) who is responsible for delivering the digital fabrication                                                            |
| Executive architect                        | 3.79                         | 4        | 1.12 | 5                                                               | 14                                                   | 107                          | Team(s) who is responsible for delivering the design (incl. design intents) through the construction                         |
| On-site assembly contractor                | 3.75                         | 4        | 1.14 | 2                                                               | 5                                                    | 111                          | Team(s) who is responsible for on-site assembling the system(s) which has been fabricated digitally                          |
| 3D Modeller                                | 3.71                         | 4        | 1.2  | 1                                                               | 78                                                   | 124                          | Team(s) who is responsible for modelling in 3D                                                                               |
| BIM specialist                             | 3.71                         | 4        | 1.14 | 1                                                               | 79                                                   | 112                          | Team(s) who is responsible for/specialising in BIM-based work (e.g. modelling using BIM-based platforms)                     |
| DFAB engineer                              | 3.71                         | 4        | 0.99 | 2                                                               | 5                                                    | 80                           | Team(s) who is responsible for the engineering design work for the digital fabrication                                       |
| Project manager                            | 3.64                         | 4        | 1.08 | 1                                                               | 89                                                   | 130                          | Team(s) who is responsible for managing the project throughout the process from design to construction completion            |
| Design architect                           | 3.64                         | 4        | 1.28 | 1                                                               | 94                                                   | 134                          | Team(s) who is responsible for delivering the design concept and the design intents                                          |
| 3D scanner                                 | 3.57                         | 4        | 1.18 | 2                                                               | 106                                                  | 115                          | Team(s) who is responsible for capturing the digital fabrication process                                                     |
| Design engineer                            | 3.43                         | 4        | 1.34 | 1                                                               | 122                                                  | 139                          | Team(s) who is responsible for delivering the engineering design (e.g. structural design, MEP design)                        |
| Consultant                                 | 3.14                         | 3        | 1.25 | 1                                                               | 149                                                  | 129                          | Team(s) who assist certain part(s) of the project deliverables (e.g. facade systems, geometry design)                        |
| 3D scanning specialist                     | 3.14                         | 3        | 1.48 | 0                                                               | 159                                                  | 157                          | Team(s) who is responsible for the 3D scanner execution or consulting work                                                   |
| <b>RESOURCES (n=18)</b>                    |                              |          |      |                                                                 |                                                      |                              |                                                                                                                              |
|                                            | $\mu$                        | $\sigma$ | Max. | n <td>RI <td><math>\sigma</math> <td>Definition</td> </td></td> | RI <td><math>\sigma</math> <td>Definition</td> </td> | $\sigma$ <td>Definition</td> | Definition                                                                                                                   |
| BIM capability                             | 4.45                         | 5        | 0.69 | 3                                                               | 1                                                    | 11                           | Capability to manage the digital design and digital fabrication process                                                      |
| BIM expertise                              | 4.43                         | 5        | 0.85 | 3                                                               | 2                                                    | 46                           | Expertise in BIM-based work for design, construction and project management                                                  |
| BIM modelling coordination platform        | 4.36                         | 5        | 0.84 | 3                                                               | 14                                                   | 44                           | BIM-based platform(s) that enables modelling and coordination work amongst multi-disciplinary teams                          |
| Platform's 3D interface capability         | 4.29                         | 4.5      | 0.91 | 2                                                               | 5                                                    | 59                           | Capacity to handle the interface(s) between systems in 3D within the platform(s)                                             |
| Platform for performance analysis          | 4.17                         | 4.5      | 1.03 | 2                                                               | 3                                                    | 16                           | Platform(s) that enables performance analysis during the design/construction process (eg structural analysis)                |
| Coordination/information exchange platform | 4.08                         | 4        | 0.79 | 3                                                               | 22                                                   | 31                           | Platform(s) that enables coordination or exchange of design/digital fabrication information amongst multi-disciplinary teams |
| Technical skillset                         | 4.08                         | 4        | 0.95 | 2                                                               | 7                                                    | 23                           | Skills to handle technical aspects (eg system design detailing or robotic control) in design and/or construction             |
| Affordable BIM platform                    | 4                            | 4        | 1.22 | 1                                                               | 34                                                   | 126                          | BIM-based platform(s) which is affordable by most people in terms of price                                                   |
| Digital performance hardware               | 3.97                         | 4        | 1.36 | 2                                                               | 5                                                    | 40                           | Hardware (eg computer) that has a high-performance specification (eg with high-speed processor)                              |
| Digital performance software               | 3.97                         | 4        | 1.36 | 2                                                               | 5                                                    | 41                           | Software that has a high-performance specification (eg with high-speed processor)                                            |
| Fabrication method intents                 | 3.58                         | 3.5      | 1.44 | 1                                                               | 98                                                   | 156                          | Concepts that captures the intended fabrication method to be executed in the construction process                            |
| Precise design provision                   | 3.54                         | 4        | 1.13 | 2                                                               | 104                                                  | 109                          | Providing accurate and detailed design information and documentation                                                         |
| Cost control system                        | 3.38                         | 3        | 0.87 | 2                                                               | 126                                                  | 49                           | System/mechanism/approach that assists in controlling costs in a project                                                     |
| Project lifecycle management platform      | 3.31                         | 4        | 1.03 | 1                                                               | 134                                                  | 88                           | Platform(s) that enables lifecycle assessment and the corresponding management approaches                                    |
| 3D Point cloud technology                  | 3.23                         | 3        | 1.36 | 1                                                               | 142                                                  | 142                          | Technology that generates 3D point cloud model/visualisation/data                                                            |
| Flexible interface system                  | 3.15                         | 4        | 1.07 | 1                                                               | 147                                                  | 96                           | Interface system (digital or physical) that has a high degree of flexibility                                                 |
| 3D scanning camera                         | 3.14                         | 3.5      | 1.51 | 0                                                               | 148                                                  | 159                          | Camera that scans a physical object into 3D model/data/data                                                                  |
| Stranding machine                          | 2.5                          | 3        | 1.57 | 0                                                               | 162                                                  | 161                          | Machine that is used to fix, squeeze or tighten an element                                                                   |
| <b>CONDITIONS (n=23)</b>                   |                              |          |      |                                                                 |                                                      |                              |                                                                                                                              |
|                                            | $\mu$                        | $\sigma$ | Max. | n <td>RI <td><math>\sigma</math> <td>Definition</td> </td></td> | RI <td><math>\sigma</math> <td>Definition</td> </td> | $\sigma$ <td>Definition</td> | Definition                                                                                                                   |
| On-site constructability                   | 4.29                         | 4.5      | 0.83 | 3                                                               | 1                                                    | 40                           | Feasibility to construct on-site after the off-site digital fabrication                                                      |
| DFAB information involved early            | 4.17                         | 4        | 0.94 | 2                                                               | 16                                                   | 66                           | When digital fabrication information is provided during the design process or before the fabrication process starts          |
| Common Virtual Environment                 | 4.08                         | 4        | 0.64 | 3                                                               | 6                                                    | 7                            | A mutually accessible virtual environment that allows multi-disciplinary teams to co-create, coordinate and collaborate      |
| Design-contractor involvement              | 4.08                         | 4        | 0.95 | 3                                                               | 25                                                   | 69                           | When the general contractor/digital fabrication trade contractor actively get involved during the design process             |
| Early contractor involvement               | 4.06                         | 4        | 0.88 | 3                                                               | 36                                                   | 53                           | When the general contractor/digital fabrication trade contractor actively get involved during the design process             |
| Information integration                    | 3.92                         | 4        | 1.19 | 1                                                               | 42                                                   | 121                          | Where information from multi-disciplinary teams are integrated                                                               |
| Flexible design                            | 3.79                         | 4        | 0.8  | 3                                                               | 61                                                   | 36                           | Where the design has a high degree of flexibility for changes                                                                |
| Appropriate project design delivery models | 3.77                         | 4        | 1.09 | 2                                                               | 65                                                   | 104                          | Project model(s) for design and delivery which is feasible to deliver project target values                                  |
| Cost control                               | 3.69                         | 4        | 1.03 | 2                                                               | 82                                                   | 89                           | Competence to control or manage costs for the digital fabrication                                                            |
| Common Data Environment                    | 3.67                         | 4        | 0.78 | 2                                                               | 86                                                   | 25                           | Mutually accessible virtual environment of database that allows multi-disciplinary teams to access, edit and share data      |
| Immersive VR Environment                   | 3.67                         | 4        | 0.89 | 2                                                               | 87                                                   | 55                           | Virtual Reality (VR) environment that provides an immersive experience for collaboration and coordination amongst teams      |
| Building codes for 3D implementation       | 3.54                         | 3        | 1.13 | 1                                                               | 105                                                  | 110                          | Building codes that assist industry to implement technology and workflow involving 3D information                            |
| Project lifecycle Management (PLM)         | 3.5                          | 4        | 1.28 | 0                                                               | 117                                                  | 160                          | Management for handling project(s) as they progress through the typical stages of the project lifecycle                      |
| On-site adaptable logistics                | 3.42                         | 4        | 1.08 | 1                                                               | 123                                                  | 101                          | Logistics provision is adaptive to real-time on-site situations or requirements                                              |
| FM management requirements                 | 3.38                         | 4        | 1.39 | 1                                                               | 127                                                  | 152                          | Information and management-related requirements regarding future Facility Management (FM) after construction                 |
| On-site adaptable logistics                | 3.38                         | 4        | 1.39 | 1                                                               | 127                                                  | 152                          | Logistics provision is adaptive to real-time on-site situations or requirements                                              |
| Point cloud simulation                     | 3.38                         | 4        | 1.39 | 0                                                               | 128                                                  | 153                          | Logistics of visual forecasting simulation using technology that generates point cloud data                                  |
| Detailed contracting environment           | 3.31                         | 3        | 0.63 | 2                                                               | 135                                                  | 5                            | Environment where contracting requirements and/or potential provisions are described in details                              |
| Knowledge transfer                         | 3.08                         | 3        | 1.12 | 1                                                               | 150                                                  | 108                          | Provision or environment that facilitates knowledge-sharing or exchange amongst multi-disciplinary teams                     |
| Human-robot interaction                    | 2.92                         | 3        | 1.16 | 1                                                               | 164                                                  | 116                          | Interactive environment or provision that enables coordination between humans and robots                                     |
| 3D-scanning provision                      | 2.79                         | 3        | 1.57 | 0                                                               | 164                                                  | 146                          | Providing environment or technology to scan in 3D and generate 3D data                                                       |
| Liability waiver                           | 2.55                         | 3        | 1.57 | 0                                                               | 161                                                  | 147                          | Legal proposition that can exempt team(s) from legal liability for the specified activities (with acknowledged risks)        |
| <b>ATTRIBUTES (n=20)</b>                   |                              |          |      |                                                                 |                                                      |                              |                                                                                                                              |
|                                            | $\mu$                        | $\sigma$ | Max. | n <td>RI <td><math>\sigma</math> <td>Definition</td> </td></td> | RI <td><math>\sigma</math> <td>Definition</td> </td> | $\sigma$ <td>Definition</td> | Definition                                                                                                                   |
| Customisable                               | 4.15                         | 4        | 0.55 | 3                                                               | 18                                                   | 2                            | With the capability for design customisation                                                                                 |
| Mutual trust and sharing amongst teams     | 4.14                         | 5        | 1.03 | 2                                                               | 20                                                   | 90                           | With trust and the willingness to share information (eg models) or risk/rewards amongst multi-disciplinary teams             |
| Optimisable                                | 4.07                         | 4        | 0.73 | 3                                                               | 30                                                   | 13                           | With the capability for architectural/engineering/construction optimisation                                                  |
| Constructable                              | 4                            | 4        | 0.78 | 3                                                               | 36                                                   | 26                           | With the capability to construct appropriately and correctly                                                                 |
| On-site integrable                         | 4                            | 4        | 0.62 | 3                                                               | 41                                                   | 4                            | With the capability to integrate the digitally fabricated system with other systems during the on-site assembly process      |
| Multi-disciplinary                         | 3.93                         | 4        | 0.62 | 3                                                               | 47                                                   | 4                            | Attribute where the digital fabrication team is design/construction                                                          |
| Certainty in cost                          | 3.92                         | 4        | 1.04 | 2                                                               | 43                                                   | 94                           | Attribute where certainty regarding the resultant cost of digital fabrication                                                |
| Knowledge capture                          | 3.85                         | 4        | 0.99 | 2                                                               | 51                                                   | 79                           | Attribute where multi-disciplinary knowledge is documented to a certain extent                                               |
| 2D & BIM integrable                        | 3.83                         | 4        | 1.11 | 2                                                               | 55                                                   | 106                          | With the capability to integrate 2D drawings and BIM information (e.g. 3D models)                                            |
| Risk sharing/agile management              | 3.83                         | 4        | 0.58 | 3                                                               | 56                                                   | 3                            | With the capability to share risks amongst teams or provision of agile management (e.g. costs)                               |
| Automated in fabrication                   | 3.77                         | 4        | 1.01 | 2                                                               | 66                                                   | 85                           | With the fabrication process being operated automatically                                                                    |
| Prefabricatable                            | 3.77                         | 4        | 1.01 | 2                                                               | 67                                                   | 86                           | With the capability to fabricate in advance before on-site assembly                                                          |
| Precise design information                 | 3.77                         | 4        | 0.95 | 3                                                               | 68                                                   | 65                           | Design information is accurate and contains sufficient information of the design intents                                     |
| Flexible design information                | 3.72                         | 4        | 1.22 | 2                                                               | 72                                                   | 127                          | With the capability to adapt to changes                                                                                      |
| Integrable design-build                    | 3.75                         | 4        | 1.22 | 2                                                               | 72                                                   | 127                          | With the capability to integrate design and construction process (e.g. Design-Build model)                                   |
| Fulfill legal & regulatory requirements    | 3.62                         | 4        | 0.96 | 2                                                               | 93                                                   | 102                          | With the compatibility to satisfy the legal/contractual and regulatory requirements (e.g. building codes)                    |
| Inclusive                                  | 3.58                         | 3        | 1.08 | 2                                                               | 99                                                   | 102                          | With the feasibility or intention to include all actors or acactors under a general situation                                |
| On schedule                                | 3.54                         | 4        | 0.97 | 2                                                               | 106                                                  | 73                           | With the feasibility to assure plans or activities proceed according to a defined schedule                                   |
| Systemic Innovation                        | 3.45                         | 3        | 0.52 | 3                                                               | 121                                                  | 1                            | Innovation(s) that cuts across traditional discipline and supply chain boundaries and fosters system integration             |
| Incentive                                  | 3.42                         | 4        | 0.79 | 2                                                               | 124                                                  | 32                           | With the impact that motivates or encourages team(s) to achieve defined values                                               |

- to be continued on the next page -

|                           |      | Rounds 1, 2 and 3 |      |      |       | Rk. by   |       | Definition                                                                                               |
|---------------------------|------|-------------------|------|------|-------|----------|-------|----------------------------------------------------------------------------------------------------------|
| $\mu$                     | Med. | $\sigma$          | Min. | Max. | $\mu$ | $\sigma$ | R I n |                                                                                                          |
| <b>PROCESESSES (n=22)</b> |      |                   |      |      |       |          |       |                                                                                                          |
| 4.21                      | 4    | 0.87              | 3    | 3    | 14    | 6        | 1     | Process to optimise the architectural design (eg. geometry)                                              |
| 4.14                      | 4    | 0.71              | 3    | 5    | 14    | 1        | 1     | Process to integrate the digital fabrication packages (eg. 3D printing)                                  |
| 4.08                      | 4    | 0.69              | 3    | 5    | 12    | 1        | 1     | Process to integrate the engineering design (eg structural/MEP performance)                              |
| 4.04                      | 4    | 0.73              | 3    | 5    | 12    | 1        | 1     | Process to optimise the performance (eg. efficiency) during the construction process                     |
| 3.92                      | 4    | 0.9               | 3    | 5    | 14    | 1        | 1     | Prefabrication process undertaken digitally                                                              |
| 3.92                      | 4    | 0.9               | 3    | 5    | 12    | 2        | 2     | Process to improve the values (eg. cost-effectiveness) of the outcomes by examination of design          |
| 3.86                      | 3    | 1                 | 3    | 5    | 14    | 1        | 1     | Process to form modules                                                                                  |
| 3.79                      | 4    | 0.8               | 3    | 5    | 14    | 3        | 3     | Process to review shop drawings for digitally fabricating the system(s)                                  |
| 3.74                      | 3    | 0.93              | 3    | 5    | 14    | 1        | 1     | Communication process where a detailed design is further rationalised to suit the constructability       |
| 3.75                      | 3    | 0.73              | 3    | 5    | 12    | 3        | 2     | Process to test the performance (eg. structural performance) of the system(s)                            |
| 3.73                      | 3    | 1.1               | 2    | 5    | 11    | 1        | 1     | Process to modify the performance (eg. structural performance) of the system(s)                          |
| 3.69                      | 4    | 0.75              | 3    | 5    | 13    | 2        | 2     | Process to test the performance of the system on-site after the off-site digital fabrication             |
| 3.64                      | 4    | 0.92              | 2    | 5    | 11    | 1        | 1     | Refinement process of the system/system performance after a test                                         |
| 3.5                       | 3    | 1.24              | 1    | 5    | 12    | 1        | 1     | Simulation process for visual forecasting that considers time/schedule                                   |
| 3.5                       | 4    | 1.38              | 0    | 5    | 14    | 1        | 1     | Design development process to adjust the design to suit a defined requirement/request/function           |
| 3.5                       | 4    | 0.85              | 2    | 5    | 14    | 2        | 1     | Process to optimise the system performance (eg. process's CO <sub>2</sub> emission)                      |
| 3.5                       | 3    | 0.7               | 2    | 5    | 12    | 1        | 1     | Design process with features being shaped according to algorithmic processes                             |
| 3.46                      | 3    | 0.67              | 3    | 5    | 12    | 1        | 1     | Design process that primarily involves modularity, prefabrication, pre-assembly and mass production      |
| 3.38                      | 3    | 1.39              | 1    | 5    | 13    | 1        | 1     | Process that commonly includes modularity, prefabrication, pre-assembly and mass production              |
| 3.38                      | 3    | 1.26              | 1    | 5    | 13    | 2        | 2     | Process of making a system/workflow conform to a certain standard of rule/definition                     |
| <b>ARTEFACTS (n=14)</b>   |      |                   |      |      |       |          |       |                                                                                                          |
| 4.29                      | 4.5  | 0.83              | 3    | 5    | 14    | 8        | 41    | Output of precise BIM-based model(s) for construction or generated during the construction process       |
| 4.23                      | 4    | 0.73              | 3    | 5    | 12    | 4        | 15    | Output of data for construction that comprises those from multi-disciplinary teams                       |
| 4.21                      | 4    | 0.89              | 3    | 5    | 14    | 4        | 13    | Output of BIM-based model(s) that comprises those from multi-disciplinary teams                          |
| 4.21                      | 4    | 0.7               | 3    | 5    | 14    | 5        | 13    | Output of BIM-based model(s) that comprises those from multi-disciplinary teams                          |
| 4.07                      | 4    | 0.83              | 3    | 5    | 14    | 4        | 32    | Output of precise BIM-based model(s) in 3D that comprises those from multi-disciplinary teams            |
| 4                         | 4    | 0.78              | 3    | 5    | 14    | 6        | 42    | Output of drawing(s) in 3D that matches the model(s) in 3D                                               |
| 4                         | 4    | 0.76              | 3    | 5    | 14    | 4        | 38    | Output of specification including information about the digital fabrication process                      |
| 3.92                      | 4    | 0.94              | 2    | 5    | 13    | 2        | 49    | Output of automated systems that can track the progress of the digital fabrication process               |
| 3.79                      | 4    | 0.97              | 2    | 5    | 11    | 2        | 49    | Output of 2D drawings with detailed information (e.g. interfaces, material specification)                |
| 3.62                      | 4    | 1.04              | 1    | 5    | 13    | 6        | 63    | Output of detailed measurements of materials and labour needed to complete a process in a project        |
| 3.62                      | 4    | 1.04              | 1    | 5    | 13    | 6        | 94    | Output of detailed measurements of materials and labour needed to complete a process in a project        |
| 3.5                       | 3.5  | 0.76              | 2    | 4    | 12    | 5        | 84    | Output of arrangement of engineered parts to create a variety of families of related objects             |
| 3.08                      | 3    | 0.76              | 2    | 4    | 13    | 1        | 151   | Output of data or visualisation from the point cloud simulation                                          |
| <b>VALUES (n=25)</b>      |      |                   |      |      |       |          |       |                                                                                                          |
| 4.36                      | 4    | 0.63              | 3    | 5    | 14    | 4        | 6     | Reward of error reduction in manufacture or assembly during the construction process                     |
| 4.07                      | 4.5  | 1.14              | 1    | 5    | 14    | 4        | 6     | Reward of quality improvement in construction or assembly (e.g. structure) of the products               |
| 4                         | 4    | 1.18              | 2    | 5    | 14    | 2        | 33    | Reward of reduction in construction or assembly costs during the design process                          |
| 3.77                      | 4    | 1.17              | 2    | 5    | 13    | 4        | 39    | Reward of uncertainty reduction during the digital fabrication process                                   |
| 3.71                      | 4    | 1.33              | 1    | 5    | 14    | 2        | 70    | Reward of capability (e.g. competence of design and digital fabrication) of the teams                    |
| 3.64                      | 4    | 0.93              | 2    | 5    | 14    | 2        | 92    | Reward of construction complexity (e.g. manufacturing steps) reduction                                   |
| 3.62                      | 4    | 1.26              | 1    | 5    | 13    | 4        | 92    | Positive impact on human skills (e.g. manufacturing steps) reduction                                     |
| 3.57                      | 3.5  | 0.78              | 2    | 5    | 13    | 2        | 96    | Positive impact on encouraging development and fabrication of highly complex design                      |
| 3.54                      | 4    | 0.92              | 2    | 5    | 14    | 4        | 103   | Positive impact on reducing conflicts (e.g. system interfaces) during the fabrication process            |
| 3.54                      | 4    | 0.97              | 2    | 5    | 13    | 3        | 103   | Positive impact on process efficiency and reduction of time spent on fabrication                         |
| 3.5                       | 3.5  | 0.76              | 2    | 4    | 13    | 1        | 108   | Positive impact on facilitating digital design development                                               |
| 3.46                      | 3    | 1.34              | 1    | 5    | 14    | 7        | 116   | Positive impact on reducing the overall project costs (including costs in design and construction)       |
| 3.46                      | 3    | 0.78              | 2    | 5    | 13    | 1        | 119   | Positive impact on fostering creativity of the project team(s)                                           |
| 3.38                      | 4    | 1.19              | 1    | 5    | 13    | 2        | 120   | Positive impact on reducing costs in particular for system interface (e.g. between two systems)          |
| 3.36                      | 4    | 1.29              | 1    | 5    | 11    | 3        | 131   | Positive impact on facilitating knowledge sharing or exchange amongst multi-disciplinary teams           |
| 3.31                      | 3    | 1.03              | 1    | 5    | 13    | 1        | 133   | Positive impact on facilitating the adoption of automation in construction                               |
| 3.25                      | 3    | 0.86              | 2    | 5    | 13    | 3        | 136   | Positive impact on facilitating sustainability performance (e.g. reuse of materials)                     |
| 3.21                      | 3    | 0.92              | 2    | 5    | 14    | 1        | 143   | Positive impact on fostering industrialisation processes (e.g. modularisation)                           |
| 3.21                      | 3    | 0.92              | 2    | 5    | 14    | 1        | 143   | Positive impact on ensuring that cost(s) are under controlled and monitored                              |
| 3.17                      | 3    | 1.27              | 1    | 5    | 13    | 1        | 145   | Positive impact on the return of investment from profits, cost reduction etc.                            |
| 3                         | 3    | 1.08              | 1    | 5    | 12    | 1        | 146   | Positive impact on ensuring that the process schedules are under controlled and monitored                |
| 2.92                      | 3    | 1.38              | 0    | 5    | 13    | 2        | 152   | Positive impact on reducing manpower to actively work on the fabrication process                         |
| 2.92                      | 3    | 0.79              | 2    | 4    | 12    | 1        | 155   | Positive impact on reducing manpower to actively work on the fabrication process                         |
| 2.92                      | 3    | 0.79              | 2    | 4    | 12    | 1        | 156   | Positive impact on reducing manpower to actively work on the fabrication process                         |
| <b>RISKS (n=28)</b>       |      |                   |      |      |       |          |       |                                                                                                          |
| 4.17                      | 4    | 1.03              | 2    | 5    | 12    | 1        | 92    | Risk where the design information or BIM information does not match the information on-site              |
| 4.15                      | 4    | 0.8               | 3    | 5    | 13    | 1        | 92    | Risk with uncertain feasibility in construction (manufacture and/or assembly)                            |
| 4.08                      | 4    | 0.95              | 2    | 5    | 13    | 3        | 19    | Risk where there is insufficient skilled labour to conduct the digital fabrication work                  |
| 3.92                      | 4    | 0.86              | 3    | 5    | 13    | 2        | 29    | Risk where the expectations amongst teams are not matching                                               |
| 3.92                      | 4    | 0.79              | 3    | 5    | 12    | 2        | 48    | Risk when digital fabrication knowledge is not integrated in design                                      |
| 3.85                      | 4    | 1.07              | 2    | 5    | 13    | 1        | 52    | Risk with errors within the platform(s) or during format exchange within platforms                       |
| 3.82                      | 4    | 1.07              | 2    | 5    | 12    | 2        | 53    | Risk of an increase in the overall costs during the digital fabrication process                          |
| 3.82                      | 4    | 0.83              | 2    | 5    | 13    | 2        | 53    | Risk when training of workers is required to conduct digital fabrication                                 |
| 3.83                      | 4    | 0.93              | 2    | 5    | 13    | 2        | 93    | Risk when the design documentation does not match the construction documentation (outputs)               |
| 3.83                      | 4    | 0.93              | 2    | 5    | 13    | 2        | 58    | Risk when the design documentation does not match the construction documentation (outputs)               |
| 3.75                      | 4    | 0.87              | 3    | 5    | 12    | 2        | 75    | Risk of over depending on BIM platform or BIM usage                                                      |
| 3.75                      | 4    | 0.87              | 3    | 5    | 12    | 2        | 76    | Risk of over depending on the supply chain during the construction process                               |
| 3.69                      | 4    | 0.75              | 2    | 5    | 13    | 1        | 84    | Risk of increase in design costs (e.g. fee to hire DFAB design coordinator)                              |
| 3.69                      | 4    | 0.75              | 2    | 5    | 13    | 2        | 84    | Risk of extending the duration of the design process (e.g. extra time is needed for design coordination) |
| 3.67                      | 4    | 0.78              | 2    | 5    | 12    | 2        | 85    | Risk with uncertain feasibility during the digital fabrication process                                   |
| 3.62                      | 3    | 0.77              | 2    | 5    | 12    | 1        | 88    | Risk of an increase in manpower to work on a certain task                                                |
| 3.58                      | 4    | 0.9               | 2    | 5    | 13    | 1        | 97    | Risk of the digital information (e.g. from different teams) are not consistent                           |
| 3.58                      | 4    | 1.26              | 1    | 5    | 12    | 3        | 100   | Risk of the digital information (e.g. from different teams) are not consistent                           |
| 3.58                      | 4    | 1.26              | 1    | 5    | 12    | 3        | 132   | Risk that there is no suitable materials for implementing digital fabrication                            |
| 3.51                      | 3    | 1.38              | 1    | 5    | 13    | 1        | 137   | Risk that there is no suitable materials for implementing digital fabrication                            |
| 3.29                      | 3    | 1.07              | 1    | 5    | 14    | 2        | 138   | Risk where the skills and knowledge amongst teams are not aligned                                        |
| 3.25                      | 3    | 1.14              | 1    | 5    | 12    | 1        | 139   | Risk of the team(s) depends too much on electricity consumption                                          |
| 3.25                      | 3    | 1.36              | 1    | 5    | 12    | 1        | 140   | Team(s)' sceptical attitude towards the adoption of digital fabrication                                  |
| 3.25                      | 3    | 1.36              | 1    | 5    | 12    | 3        | 141   | Team(s)' sceptical attitude towards the adoption of digital fabrication                                  |
| 3                         | 3    | 1.48              | 1    | 5    | 12    | 2        | 153   | Risk of cyber attack in systems, networks, programs, devices and data                                    |
| 2.92                      | 3    | 1.66              | 0    | 5    | 12    | 1        | 158   | Risk of the buildings codes do not align to the situation in digital fabrication                         |
| 2.92                      | 3    | 1.66              | 0    | 5    | 12    | 1        | 158   | Risk of the buildings codes do not align to the situation in digital fabrication                         |
| 2.5                       | 2.5  | 1.57              | 0    | 5    | 12    | 1        | 163   | Risk of demoting human's development of skills and knowledge                                             |
